# Supplementary material for: Mechanistic Insights into Potassium-Conferred Drought Stress Tolerance in Cultivated and Tibetan Wild Barley: Differential Osmoregulation, Nutrient Retention, Secondary Metabolism and Antioxidative Defense Capacity
Source: MDPI journal article supplement (doi:10.3390/ijms222313100), 2021-12-03
Supplement: s1 [file s1]

## Supplementary Materials

**Table S1.** *F*-value/*P*-value for the effect of K nutrition on growth parameters of three barley genotypes in response to drought stress.

| Source           | <i>F</i> -value/ <i>P</i> -value         |                                         |                      |                     |
|------------------|------------------------------------------|-----------------------------------------|----------------------|---------------------|
|                  | Shoot DW<br>( $\mu\text{g plant}^{-1}$ ) | Root DW<br>( $\mu\text{g plant}^{-1}$ ) | Shoot height<br>(cm) | Root length<br>(cm) |
| <b>Genotype</b>  | 3.59/0.036*                              | 3.54/0.0376*                            | 10.74/0.01**         | 9.65/0.0003**       |
| <b>Treatment</b> | 23.37/0**                                | 3.85/0.0157*                            | 7.85/0.0169*         | 3.61/0.0205*        |
| <b>G×T</b>       | 2.72/0.025*                              | 5.41/0.0003**                           | 4.2053/0.002**       | 1.4/0.2464          |

G×T, Interaction between genotype and treatment; \* and \*\*, significant at 0.05 and 0.01 probability level, respectively.

**Table S2.** *F*-value/*P*-value for the effect of K nutrition on photosynthetic parameters of three barley genotypes in response to drought stress.

| Source           | <i>F</i> -value/ <i>P</i> -value |               |                                                                        |                                                                |                                                            |                                                                             |
|------------------|----------------------------------|---------------|------------------------------------------------------------------------|----------------------------------------------------------------|------------------------------------------------------------|-----------------------------------------------------------------------------|
|                  | SPAD                             | <i>Fv/Fm</i>  | <i>Pn</i><br>( $\mu\text{mol CO}_2$<br>$\text{m}^{-2} \text{s}^{-1}$ ) | <i>Gs</i><br>( $\text{mol H}_2\text{O m}^{-2} \text{s}^{-1}$ ) | <i>Ci</i><br>( $\mu\text{mol CO}_2$<br>$\text{mol}^{-1}$ ) | <i>Tr</i><br>( $\text{mmol H}_2\text{O}$<br>$\text{m}^{-2} \text{s}^{-1}$ ) |
| <b>Genotype</b>  | 19.85/0.002**                    | 4.813/0.0185* | 17.14/0.0033**                                                         | 3.414/0.1023                                                   | 0.342/0.7232                                               | 4.02/0.078                                                                  |
| <b>Treatment</b> | 18.6/0.0019**                    | 32.11/0**     | 27.736/0.0006**                                                        | 8.561/0.0138*                                                  | 13.55/0.0044**                                             | 11.91/0.006**                                                               |
| <b>G×T</b>       | 7.03/0**                         | 1.4/0.26      | 4.27/0.0008**                                                          | 12.786/0**                                                     | 8.757/0**                                                  | 12.5/0**                                                                    |

G×T, Interaction between genotype and treatment; \* and \*\*, significant at 0.05 and 0.01 probability level, respectively.

**Table S3.** *F*-value/*P*-value for the effect of K nutrition on shoot Ca, Na, K, Mg concentrations and Na<sup>+</sup>/K<sup>+</sup> ratio of three barley genotypes in response to drought stress.

| Source           | <i>F</i> -value/ <i>P</i> -value                     |               |               |                |                                          |                                                     |                |               |              |                                          |
|------------------|------------------------------------------------------|---------------|---------------|----------------|------------------------------------------|-----------------------------------------------------|----------------|---------------|--------------|------------------------------------------|
|                  | Shoot mineral concentrations (mg g <sup>-1</sup> DW) |               |               |                |                                          | Root mineral concentrations (mg g <sup>-1</sup> DW) |                |               |              |                                          |
|                  | Ca                                                   | K             | Mg            | Na             | Na <sup>+</sup> /K <sup>+</sup><br>ratio | Ca                                                  | K              | Mg            | Na           | Na <sup>+</sup> /K <sup>+</sup><br>ratio |
| <b>Genotype</b>  | 1.65/0.215                                           | 121.52/0**    | 7.82/0.0027** | 26.23/0**      | 42.15/0**                                | 3.644/0.043*                                        | 123.20/0*<br>* | 0.253/0.78    | 4.994/0.016* | 4.2/0.028*                               |
| <b>Treatment</b> | 13.77/0**                                            | 37.3/0.0003** | 37.44/0**     | 10.44/0.0002** | 30.1/0**                                 | 9.64/0.0003**                                       | 37.79/0**      | 11.4/0.0001** | 49.61/0**    | 17.76/0**                                |
| <b>G×T</b>       | 1.933/0.1202                                         | 1.0138/0.44   | 4.8/0.0029**  | 6.00/0.0008**  | 7.6/0.0002**                             | 0.206/0.97                                          | 1.13/0.4       | 0.441/0.843   | 1.15/0.367   | 0.33/0.914                               |

G×T, Interaction between genotype and treatment; \* and \*\*, significant at 0.05 and 0.01 probability level, respectively.

**Table S4.** *F*-value/*P*-value for the effect of K nutrition on shoot and root antioxidant enzyme activities and MDA contents of three barley genotypes in response to drought stress.

| Source           | <i>F</i> -value/ <i>P</i> -value          |                                        |                                        |                                        |                                  |
|------------------|-------------------------------------------|----------------------------------------|----------------------------------------|----------------------------------------|----------------------------------|
|                  | SOD<br>(Unit mg <sup>-1</sup><br>protein) | POD<br>(Unit mg <sup>-1</sup> protein) | APX<br>(Unit mg <sup>-1</sup> protein) | CAT<br>(Unit mg <sup>-1</sup> protein) | MDA<br>(nmol g <sup>-1</sup> FW) |
| <b>Shoot</b>     |                                           |                                        |                                        |                                        |                                  |
| <b>Genotype</b>  | 9.55/0.001**                              | 2.23/0.131                             | 10.20/0.0007**                         | 2.69/0.09                              | 14.54/0.005**                    |
| <b>Treatment</b> | 15.62/0**                                 | 5.53/0.005**                           | 29.33/0**                              | 14.86/0**                              | 39.07/0.0002**                   |
| <b>G×T</b>       | 4.24/0.0055**                             | 1.095/0.396                            | 5.38/0.001**                           | 4.92/0.002**                           | 4.126/0.0063**                   |
| <b>Root</b>      |                                           |                                        |                                        |                                        |                                  |
| <b>Genotype</b>  | 1.71/0.26                                 | 2.697/0.146                            | 16.21/0**                              | 2.2/0.14                               | 12.55/0.0072**                   |
| <b>Treatment</b> | 3.66/0.083                                | 1.2662/0.37                            | 21.43/0**                              | 6.15/0.003**                           | 8.91/0.0125*                     |
| <b>G×T</b>       | 16.15/0**                                 | 24.471/0**                             | 7.04/0.0003**                          | 0.976/0.47                             | 7.82/0.0001**                    |

G×T, Interaction between genotype and treatment; \* and \*\*, significant at 0.05 and 0.01 probability level, respectively.

**Table S5.** *F*-value/*P*-value for the effect of K nutrition on shoot and root H<sup>+</sup>/K<sup>+</sup> ATPase and Ca<sup>2+</sup>/Mg<sup>2+</sup> ATPase activities of three barley genotypes in response to drought stress.

| Source           | <i>F</i> -value/ <i>P</i> -value                                                                   |                                                                                                      |                                                                                                              |                                                                                                             |
|------------------|----------------------------------------------------------------------------------------------------|------------------------------------------------------------------------------------------------------|--------------------------------------------------------------------------------------------------------------|-------------------------------------------------------------------------------------------------------------|
|                  | Shoot H <sup>+</sup> /K <sup>+</sup> ATPase<br>(μmol Pi mg <sup>-1</sup> protein h <sup>-1</sup> ) | Root H <sup>+</sup> /K <sup>+</sup> ATPase<br>(μmol Pi mg <sup>-1</sup><br>protein h <sup>-1</sup> ) | Shoot Ca <sup>2+</sup> /Mg <sup>2+</sup><br>ATPase<br>(μmol Pi mg <sup>-1</sup><br>protein h <sup>-1</sup> ) | Root Ca <sup>2+</sup> /Mg <sup>2+</sup><br>ATPase<br>(μmol Pi mg <sup>-1</sup><br>protein h <sup>-1</sup> ) |
| <b>Genotype</b>  | 50.1455/0**                                                                                        | 74.6149/0**                                                                                          | 3.7012/0.0412*                                                                                               | 2.1047/0.1458                                                                                               |
| <b>Treatment</b> | 27.3965/0**                                                                                        | 91.6315/0**                                                                                          | 7.0094/0.0018**                                                                                              | 4.4523/0.0137*                                                                                              |
| <b>G×T</b>       | 11.1092/0**                                                                                        | 43.2296/0**                                                                                          | 3.1811/0.0211*                                                                                               | 1.2271/0.3303                                                                                               |

G×T, Interaction between genotype and treatment; \* and \*\*, significant at 0.05 and 0.01 probability level, respectively.

**Table S6.** *F*-value/*P*-value for the effect of K nutrition on shoot and root proline, glycine betaine, soluble sugar and soluble protein contents of three barley genotypes in response to drought stress.

| Source    | <i>F</i> -value/ <i>P</i> -value      |                                               |                                            |                                                |                                       |                                               |                                            |                                              |
|-----------|---------------------------------------|-----------------------------------------------|--------------------------------------------|------------------------------------------------|---------------------------------------|-----------------------------------------------|--------------------------------------------|----------------------------------------------|
|           | Shoot                                 |                                               |                                            |                                                | Root                                  |                                               |                                            |                                              |
|           | Proline<br>( $\mu\text{g g}^{-1}$ FW) | Glycine betaine<br>( $\mu\text{g g}^{-1}$ DW) | Soluble sugars<br>( $\text{mg g}^{-1}$ DW) | Soluble proteins<br>( $\mu\text{g g}^{-1}$ FW) | Proline<br>( $\mu\text{g g}^{-1}$ FW) | Glycine betaine<br>( $\mu\text{g g}^{-1}$ DW) | Soluble sugars<br>( $\text{mg g}^{-1}$ DW) | Soluble proteins<br>( $\text{mg g}^{-1}$ DW) |
| Genotype  | 91.31/0**                             | 57.52/0**                                     | 6.144/0.0076**                             | 1610.10/0**                                    | 0.81/0.4575                           | 13.42/0.0002**                                | 271.503/0**                                | 808.56/0*<br>*                               |
| Treatment | 546.43/0*<br>*                        | 186.84/0*<br>*                                | 133.898/0**                                | 694.5/0**                                      | 2.87/0.0596                           | 42.97/0**                                     | 140.34/0**                                 | 16.44/0**                                    |
| G×T       | 22.88/0**                             | 24.91/0**                                     | 128.969/0**                                | 534.87/0**                                     | 6.91/0.0003**                         | 1.77/0.151                                    | 109.66/0**                                 | 39.32/0**                                    |

G×T, Interaction between genotype and treatment; \* and \*\*, significant at 0.05 and 0.01 probability level, respectively.

**Table S7.** *F*-value/*P*-value for the effect of K nutrition on secondary metabolism related enzymes of three barley genotypes in response to drought stress.

| Source    | <i>F</i> -value/ <i>P</i> -value       |                                        |                                           |                                            |                                        |                                        |                                           |                                            |
|-----------|----------------------------------------|----------------------------------------|-------------------------------------------|--------------------------------------------|----------------------------------------|----------------------------------------|-------------------------------------------|--------------------------------------------|
|           | Shoot                                  |                                        |                                           |                                            | Root                                   |                                        |                                           |                                            |
|           | PAL<br>(Unit $\text{mg}^{-1}$ protein) | PPO<br>(Unit $\text{mg}^{-1}$ protein) | CAD<br>( $\mu\text{mol mg}^{-1}$ protein) | SKDH<br>( $\mu\text{mol mg}^{-1}$ protein) | PAL<br>(Unit $\text{mg}^{-1}$ protein) | PPO<br>(Unit $\text{mg}^{-1}$ protein) | CAD<br>( $\mu\text{mol mg}^{-1}$ protein) | SKDH<br>( $\mu\text{mol mg}^{-1}$ protein) |
| Genotype  | 0.27/0.77                              | 18.04/0**                              | 0.8303/0.4491                             | 17.04/0**                                  | 14.49/0.0001**                         | 19.2/0**                               | 34.8/0**                                  | 4.96/0.0167*                               |
| Treatment | 62.94/0**                              | 4.72/0.011*                            | 33.4/0**                                  | 26.9/0**                                   | 16.44/0**                              | 6.37/0.0029*<br>*                      | 12.19/0.0001**                            | 0.94/0.4401                                |
| G×T       | 18.72/0**                              | 1.69/0.171                             | 4.71/0.0032**                             | 6.1/0.0007**                               | 11.87/0**                              | 3.0454/0.0253*                         | 59.63/0**                                 | 4.16/0.0061**                              |

G×T, Interaction between genotype and treatment; \* and \*\*, significant at 0.05 and 0.01 probability level, respectively.

**Table S8.** *F*-value/*P*-value for the effect of K nutrition on secondary metabolites of three barley genotypes in response to drought stress.

| Source           | <i>F</i> -value/ <i>P</i> -value         |                                        |                                           |                                               |                                       |                                        |                                           |                                               |
|------------------|------------------------------------------|----------------------------------------|-------------------------------------------|-----------------------------------------------|---------------------------------------|----------------------------------------|-------------------------------------------|-----------------------------------------------|
|                  | Shoot                                    |                                        |                                           |                                               | Root                                  |                                        |                                           |                                               |
|                  | Callose<br>( $\mu\text{g g}^{-1}$<br>FW) | Phenols<br>( $\text{mg g}^{-1}$<br>FW) | Flavonoids<br>( $\text{mg g}^{-1}$<br>FW) | Chitinase<br>( $\text{U mg}^{-1}$<br>protein) | Callose<br>( $\mu\text{g g}^{-1}$ FW) | Phenols<br>( $\text{mg g}^{-1}$<br>FW) | Flavonoids<br>( $\text{mg g}^{-1}$<br>FW) | Chitinase<br>( $\text{U mg}^{-1}$<br>protein) |
| <b>Genotype</b>  | 8.8/0.016<br>4*                          | 5.09/0.051                             | 1.996/0.217                               | 4.35/0.068                                    | 7.04/0.0267                           | 0.81/0.488                             | 1.155/0.37<br>7                           | 4.27/0.070<br>1                               |
| <b>Treatment</b> | 3.7/0.081<br>2                           | 0.86/0.513                             | 34.7/0.0003<br>**                         | 4.505/0.05<br>6                               | 47.9/0.0001<br>**                     | 19.5/0.0017<br>**                      | 0.44/0.731                                | 5.17/0.042<br>*                               |
| <b>G×T</b>       | 50.21/0**                                | 2853.02/0<br>**                        | 689.12/0**                                | 37.4/0**                                      | 28.006/0**                            | 110.09/0**                             | 46.57/0**                                 | 165.59/0*<br>*                                |

G×T, Interaction between genotype and treatment; \* and \*\*, significant at 0.05 and 0.01 probability level, respectively.

**Table S9.** *F*-value/*P*-value for the effect of K nutrition on antioxidant enzymes related gene expression of three barley genotypes in response to drought stress.

| Source           | <i>F</i> -value/ <i>P</i> -value |                |                    |                 |               |                 |                 |                 |
|------------------|----------------------------------|----------------|--------------------|-----------------|---------------|-----------------|-----------------|-----------------|
|                  | Shoot                            |                |                    |                 | Root          |                 |                 |                 |
|                  | <i>CAT1</i>                      | <i>CAT2</i>    | <i>CuZn-SOD</i>    | <i>APX</i>      | <i>CAT1</i>   | <i>CAT2</i>     | <i>CuZn-SOD</i> | <i>APX</i>      |
| <b>Genotype</b>  | 0.047/0.9<br>5                   | 2.73/0.143     | 11.24/0.0004*<br>* | 4.34/0.068      | 1.16/0.3<br>7 | 5.45/0.044<br>* | 4.964/0.05<br>3 | 7.93/0.02*<br>* |
| <b>Treatment</b> | 2.22/0.19                        | 1.21/0.38      | 10.33/0.0002*<br>* | 8.30/0.014<br>* | 2.5/0.16      | 6.32/0.028<br>* | 2.98/0.11       | 2.78/0.13<br>3  |
| <b>G×T</b>       | 55.99/0**                        | 103.77/0*<br>* | 9.14/0**           | 11.52/0**       | 19.7/0**      | 68.71/0**       | 27.71/0**       | 14.33/0**       |

G×T, Interaction between genotype and treatment; \* and \*\*, significant at 0.05 and 0.01 probability level, respectively.

**Table S10.** *F*-value/*P*-value for the effect of K nutrition on secondary metabolism related gene expression of three barley genotypes in response to drought stress.

| Source           | <i>F</i> -value/ <i>P</i> -value |            |            |             |            |            |             |             |
|------------------|----------------------------------|------------|------------|-------------|------------|------------|-------------|-------------|
|                  | Shoot                            |            |            |             | Root       |            |             |             |
|                  | <i>PAL</i>                       | <i>PPO</i> | <i>CAD</i> | <i>SKDH</i> | <i>PAL</i> | <i>PPO</i> | <i>CAD</i>  | <i>SKDH</i> |
| <b>Genotype</b>  | 1.017/0.42                       | 0.63/0.565 | 0.273/0.77 | 2.6/0.154   | 4.74/0.058 | 1.332/0.33 | 6.12/0.036* | 4.1/0.076   |
| <b>Treatment</b> | 0.79/0.54                        | 1.41/0.33  | 0.75/0.562 | 6.02/0.03*  | 1.96/0.22  | 1.89/0.23  | 1.663/0.273 | 2.5/0.16    |
| <b>G×T</b>       | 30.89/0**                        | 448.75/0** | 352.3/0**  | 33.75/0**   | 30.98/0**  | 1046.8/0** | 102.48/0**  | 36.13/0**   |

G×T, Interaction between genotype and treatment; \* and \*\*, significant at 0.05 and 0.01 probability level, respectively.

**Table S11.** Candidate genes and corresponding primers used for qRT-PCR experiments.

| Gene           | Forward primer (5'-3') | Reverse primer (5'-3') |
|----------------|------------------------|------------------------|
| <i>HvCZSOD</i> | CACCCAGGAGGGAGATGGTA   | GGTTGAAGTGCGGTCCTACA   |
| <i>HvAPX1</i>  | CGGAGCTTTTGAGTGGTGACA  | CCGCAGCATATTTCTCCACAA  |
| <i>HvCAT1</i>  | CCCGTCTGGAACAACAAC     | CCCCGTGCATGAACAAC      |
| <i>HvCAT2</i>  | CGACGACAAGATGCTGCAGT   | TGGTTGTTCTTGAAGCCGC    |
| <i>PAL</i>     | CCCAAGTTTGACTATGGCT    | ATCTTGTTGTGCTGCTCTG    |
| <i>PPO</i>     | TCTACAACGAGAGGCGTGAC   | GGTCGATCAGCTGGTCTCTT   |
| <i>CAD</i>     | AAGAGACAGGAGGCTTTGGA   | GGTAAGGCTCAAGAGGGTGA   |
| <i>SKDH</i>    | TCTTGCAAACACAACAGCAA   | CACATTCTGCAGCTTCCCTA   |

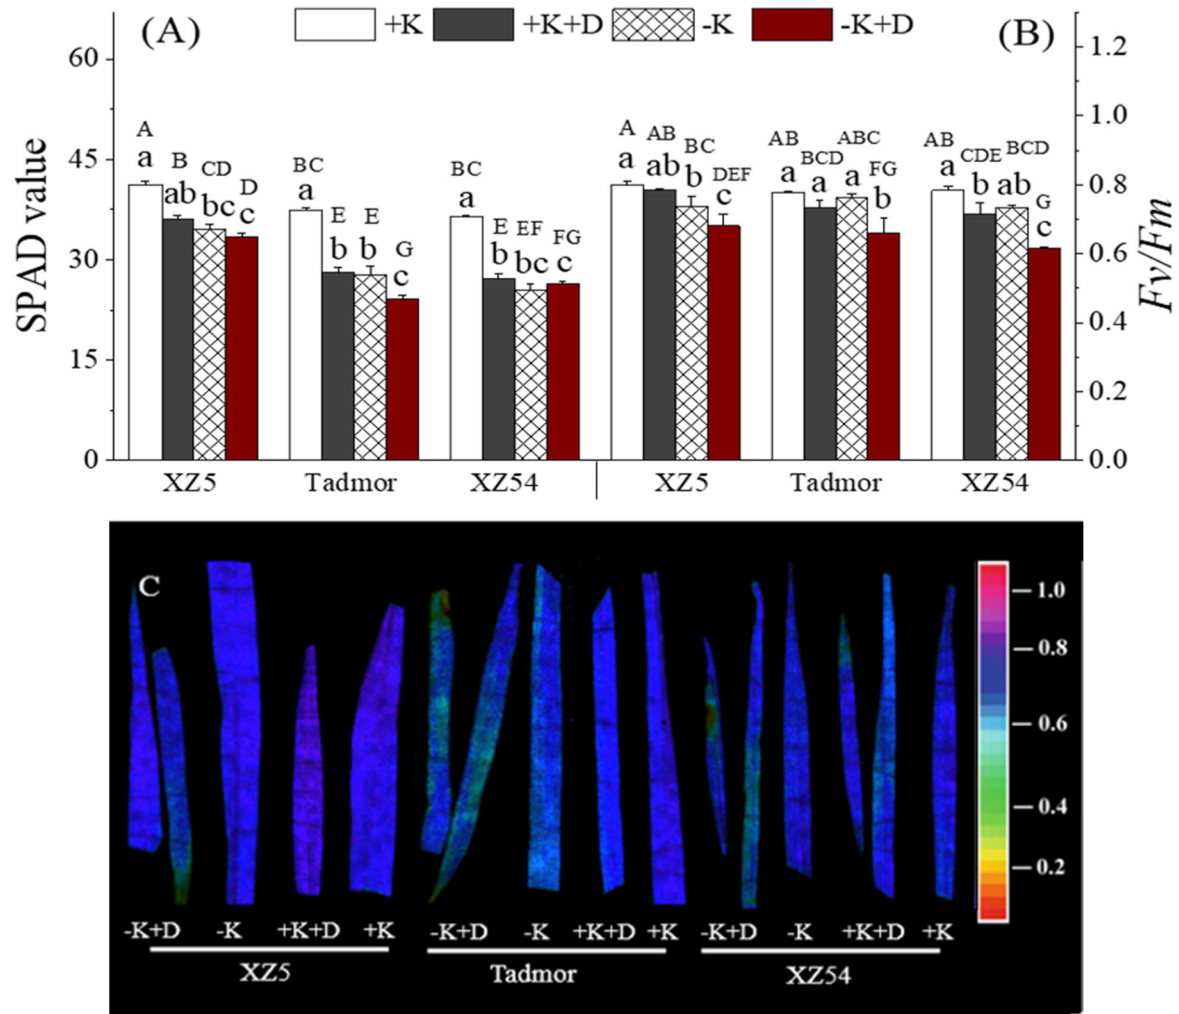

**Figure S1.** Effect of drought and K deprivation, applied either alone or in combined, on relative chlorophyll contents (SPAD values) (A) and chlorophyll fluorescence yield ( $F_v/F_m$ ) (B), and false color images of  $F_v/F_m$  in response to drought stress (C) of three barley genotypes. Different capital and small letter(s) indicate significant differences ( $P < 0.05$ ) among the genotypes and among the 4 treatments within each genotype, respectively. Error bars represent standard deviations ( $n = 4$ ).

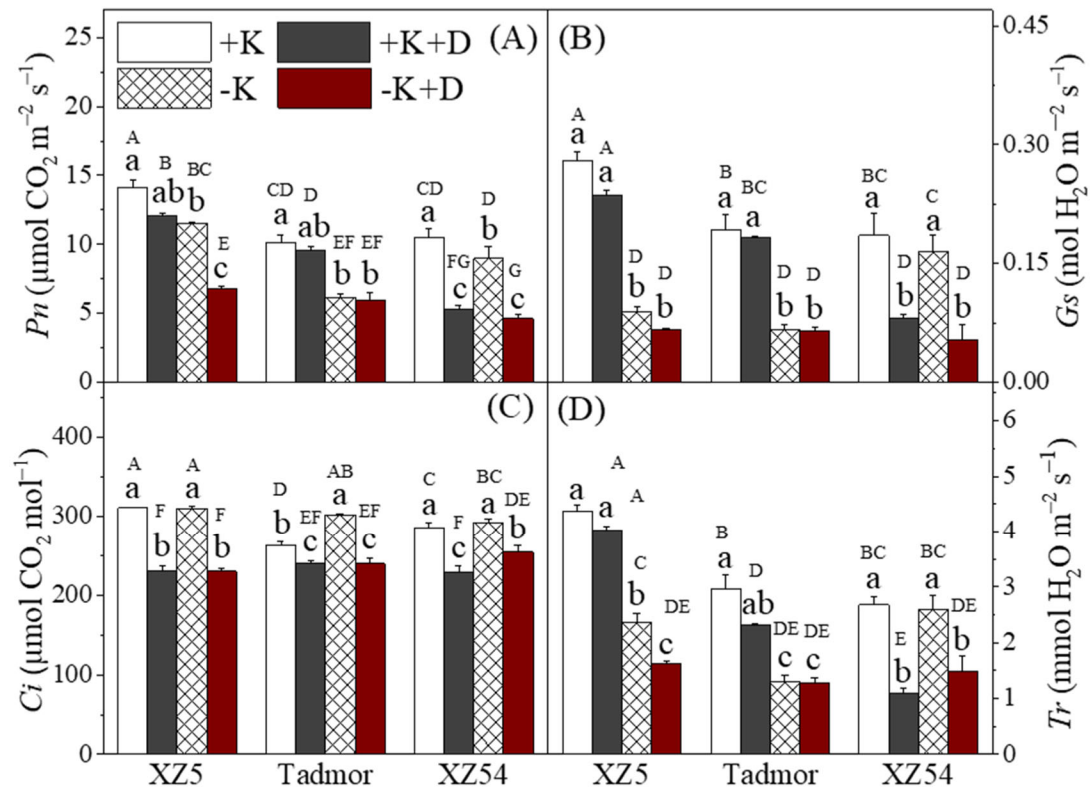

**Figure S2.** Effect of drought and K deprivation, applied either alone or in combined, on photosynthetic parameters of three barley genotypes. Different capital and small letter(s) indicate significant differences ( $P < 0.05$ ) among the genotypes and among the 4 treatments within each genotype, respectively. Values in parenthesis express the percentage decrease (-) with respect to control. Error bars represent standard deviations ( $n = 3$ ).

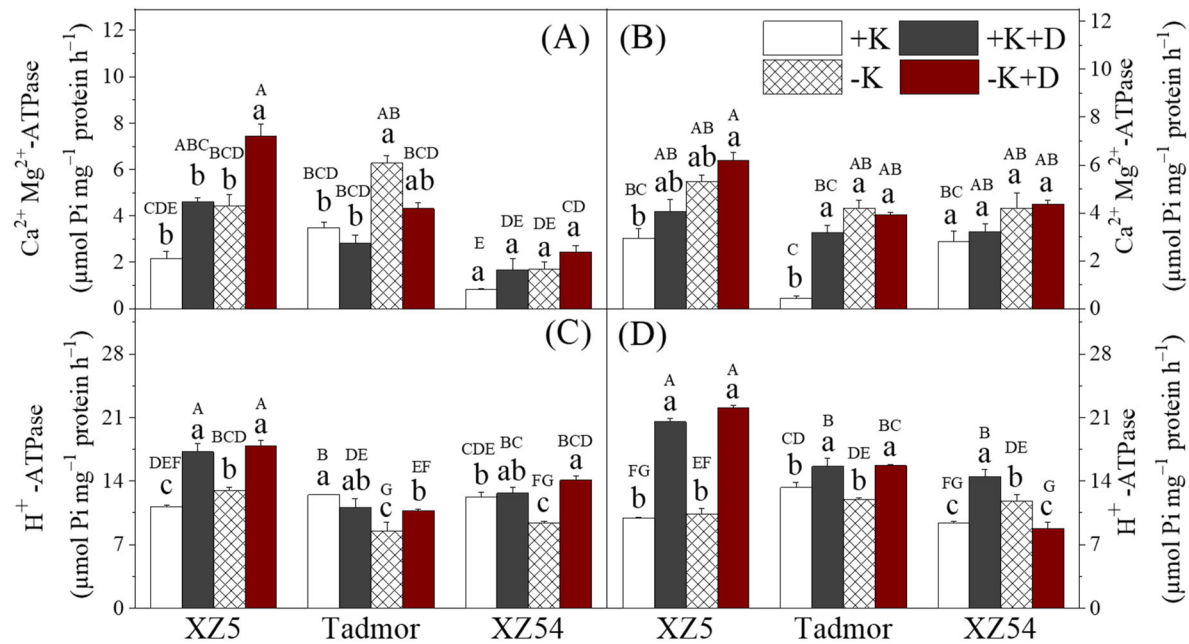

**Figure S3.** Effect of alone and combined stress of drought and K deprivation on  $\text{Ca}^{2+} \text{Mg}^{2+}\text{-ATPase}$  and  $\text{H}^{+}\text{-ATPase}$  activities in leaves (A, C) and roots (B, D) of three barley genotypes. Different capital and small letter(s) indicate significant differences ( $P < 0.05$ ) among the geno-types and among the treatments within each genotype, respectively. +K (control), +K+PEG, -K, and -K+PEG, correspond to basic nutrition solution with normal K of 1 mM K (BNS), BNS+20% Polyethylene glycol 6000 (PEG), BNS without K (K deprivation), and BNS without K +20% PEG, respectively. Error bars represent standard deviations ( $n = 3$ ).
